# Supplementary material
Source: PubMed Central journal article supplement (PMC3244082)
Supplement: NIHMS310736-supplement-01.pdf [file NIHMS310736-supplement-01.pdf]

Appendix A (ONLINE MATERIALS). Structural Equation Model Showing the Reciprocal Relationship between Favorable/Adverse Social Environment and Aggression

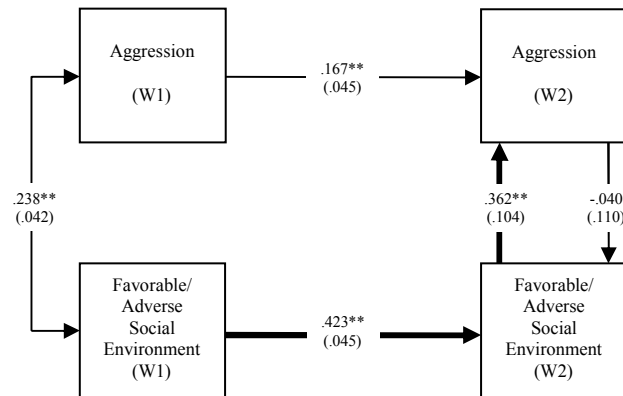

Note:  $\chi^2=7.186$ ,  $df=1$ ,  $p=.01$ . SRMR=.03, CFI=.97. The values presented are standardized parameter estimates and the standard errors are in parentheses. The bold lines indicate a significant causal order.

\*\* $p \leq .01$ ; \* $p \leq .05$ , † $p < .10$  (two-tailed tests),  $n=505$

Appendix B (ONLINE MATERIALS). Structural Equation Model Showing the Reciprocal Relationship between Hostile Orientation and Aggression

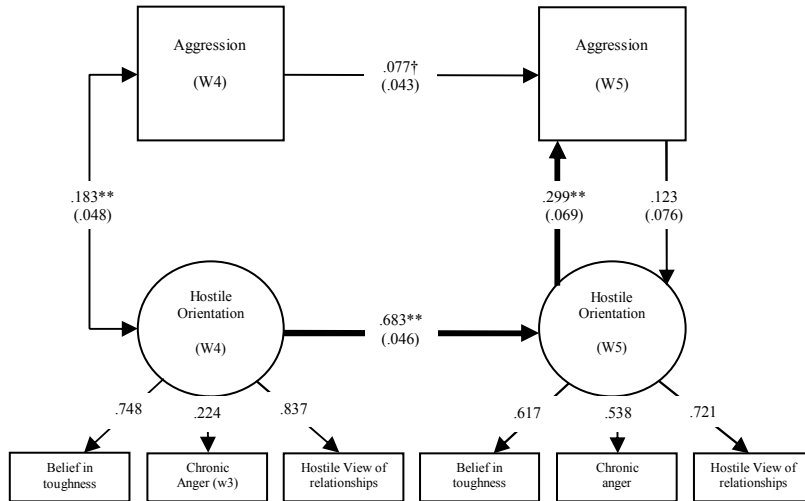

Note:  $\chi^2=70.54$ ,  $df=15$ ,  $p=.00$ . SRMR=.04, CFI=.94. The values presented are standardized parameter estimates and the standard errors are in parentheses. The bold lines indicate a significant causal order. Chronic anger was not include in the Wave 4 survey, thus Wave 4 were used in this model. \*\* $p \leq .01$ ; \* $p \leq .05$ , † $p < .10$  (two-tailed tests),  $n=505$

Social environment, genotype, and aggression

NOTE TO BE INCLUDED IN ONLONE MATERIALS
